# Supplementary material for: Development of an active site titration reagent for α-amylases
Source: Royal Society of Chemistry journal article supplement (doi:10.1039/d0sc05380e), 2020-11-03
Supplement: d0sc05380e1.pdf [file d0sc05380e1.pdf]

## **An Active Site Titration Reagent for $\alpha$ -Amylases**

Ryan P. Sweeney, Phillip M. Danby, Andreas Geissner, Ryan Karimi, Jesper Brask, & Stephen

G. Withers

### **Table of Contents**

|                                      |           |
|--------------------------------------|-----------|
| <b>1. Synthesis.....</b>             | <b>2</b>  |
| <b>2. Intact-MS Experiments.....</b> | <b>7</b>  |
| <b>3. Kinetics.....</b>              | <b>10</b> |
| <b>4. Calibration Curves.....</b>    | <b>16</b> |
| <b>5. Titrations.....</b>            | <b>17</b> |
| <b>References.....</b>               | <b>24</b> |

## 1. Synthesis. General Methods:

All reagents were purchased from commercial sources and used without further purification. 2-Chloro-4-nitrophenol  $\alpha$ -maltotrioside (CNP-G3) was purchased from Carbosynth. Cyclodextrin glucanotransferase (CGTase) was a gift from Amano Enzyme, Inc. *Effusibacillus pohliae* amylase (EPA), *Aspergillus oryzae* amylase (AOA), *Rhizomucor pusillus* amylase (RPA),<sup>1</sup> and amyloglucosidase (AMG) were gifts from Novozymes. Porcine pancreatic amylase (PPA) was purchased from Sigma Aldrich Chemical Company; human pancreatic  $\alpha$ -amylase (HPA) was isolated as described previously.<sup>2</sup> Compounds **2** and **4** were prepared via literature methods.<sup>3,4</sup> 2,6-Difluorocoumarin is referred to as F<sub>2</sub>MU. Diisopropyl azodicarboxylate is referred to as DIAD. Petroleum ether is referred to as pet. ether. Dry THF was distilled from Na/benzophenone under N<sub>2</sub>. Dry CH<sub>3</sub>OH was distilled from KOH under N<sub>2</sub>. Unless otherwise stated, all reactions were carried out under an argon atmosphere and were monitored by TLC on silica gel 60 F<sub>254</sub> (0.25 mm, Merck). Spots were visualized by UV light and/or by charring with 1% Ce(SO<sub>4</sub>)<sub>2</sub>·4H<sub>2</sub>O and 5% (NH<sub>4</sub>)Mo<sub>7</sub>O<sub>24</sub>·4H<sub>2</sub>O in 10% H<sub>2</sub>SO<sub>4</sub>. In the processing of reaction mixtures, solutions of organic solvents were washed with equal volumes of aqueous solutions. Solvents were evaporated *in vacuo* at temperatures  $\leq 40$  °C. Column chromatography was performed on silica gel 60 (Silica Flash, 40–63  $\mu$ m, 60 Å). <sup>1</sup>H NMR spectra were recorded at 400 MHz and chemical shifts are referenced to HOD (D<sub>2</sub>O, 4.79 ppm). <sup>13</sup>C NMR spectra were recorded at 101 MHz, and chemical shifts referenced to external acetone (31.07 ppm, D<sub>2</sub>O). <sup>19</sup>F NMR spectra were recorded at 377 MHz, and chemical shifts referenced to external CFCl<sub>3</sub> (0.00 ppm, CD<sub>3</sub>OD). All NMR assignments were made by appropriate 2D NMR experiments. Electrospray ionization mass spectra (ESI-MS) were recorded on a Waters/Micromass ion-trap spectrometer with samples dissolved in CH<sub>2</sub>Cl<sub>2</sub>, CH<sub>3</sub>OH, or H<sub>2</sub>O.

### Scheme for the Synthesis of Compound 5:

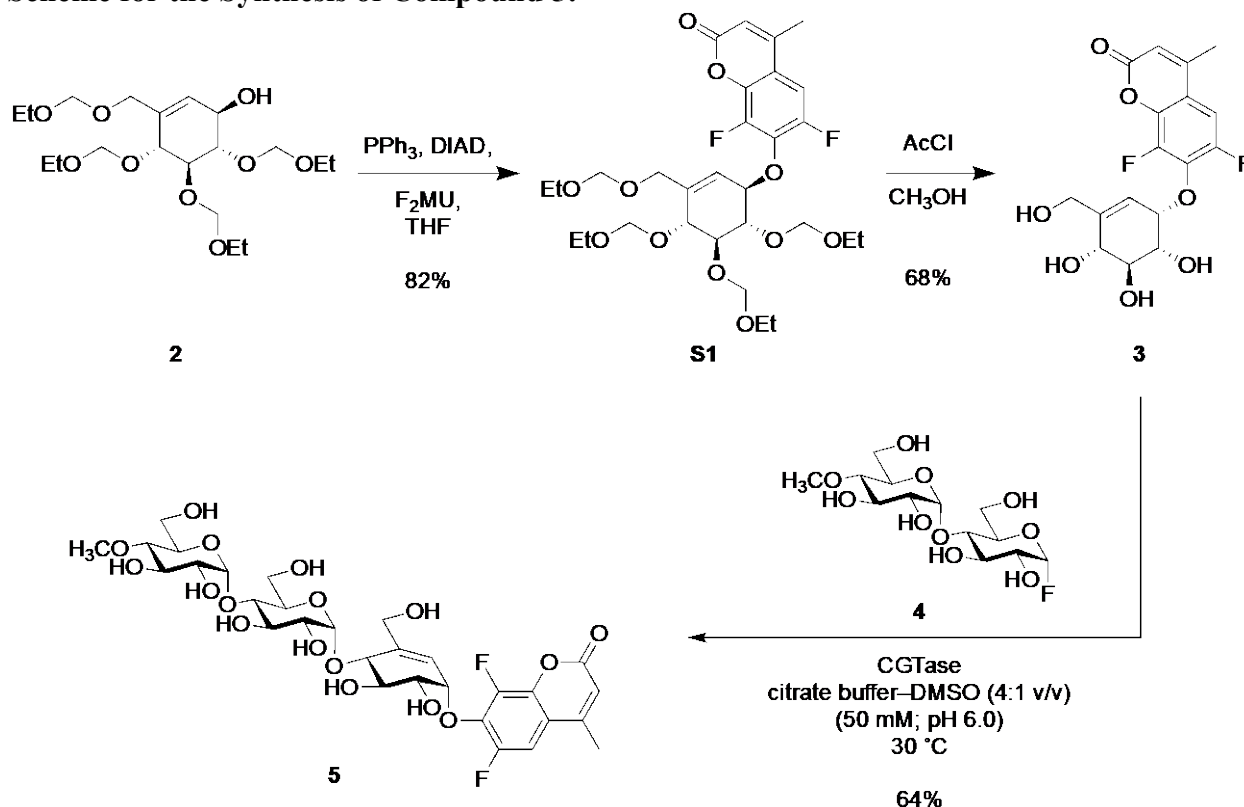

### Synthetic Procedures:

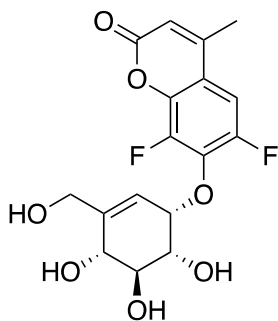

**7-*O*-[(1*S*,2*S*,3*S*,4*R*)-2,3,4-tris-*O*-(hydroxy)-5-hydroxymethyl-cyclo-5-ene]-6,8-difluoro-4-methylcoumarin (3).** To a solution of PPh<sub>3</sub> (957 mg, 3.65 mmol) in dry THF (15.0 mL), was added DIAD (0.40 mL, 2.03 mmol) dropwise at 0 °C, and the resulting mixture was stirred for 15 min at 0 °C. A solution of **2**<sup>3</sup> (268 mg; 0.66 mmol) and F<sub>2</sub>Mu (183 mg, 0.86 mmol) in THF (10.0 mL) was added dropwise to the DIAD–PPh<sub>3</sub> solution at 0 °C, and the resulting mixture was stirred for 3 h at 4 °C, then a solution of CH<sub>3</sub>OH–H<sub>2</sub>O (2.5 mL, 1:1 v/v) was added. The mixture was

4

chromatography (100% EtOAc→9:1 EtOAc–CH<sub>3</sub>OH→7:2:1 EtOAc–CH<sub>3</sub>OH–H<sub>2</sub>O) and lyophilized to yield **5** (32 mg, 64%), as a fluffy, white solid. *R<sub>f</sub>* 0.31 (7:2:1 EtOAc–CH<sub>3</sub>OH–H<sub>2</sub>O); <sup>1</sup>H NMR (400 MHz, D<sub>2</sub>O, δ<sub>H</sub>) 7.40 (dd, *J* = 11.2, 1.9 Hz, 1 H), 6.36 (s, 1 H), 6.06 (d, *J* = 4.9 Hz, 1 H), 5.45 (d, *J* = 4.0 Hz, 1 H), 5.41 (d, *J* = 3.9 Hz, 1 H), 5.11–5.05 (m, 1 H), 4.47 (dd, *J* = 10.1, 7.3 Hz, 1 H), 4.40 (d, *J* = 7.3 Hz, 1 H), 4.25 (s, 2 H), 4.05–3.53 (m, 15 H), 3.22 (t, *J* = 9.6 Hz, 1 H), 2.40 (d, *J* = 1.1 Hz, 3 H); <sup>13</sup>C NMR (101 MHz, D<sub>2</sub>O, δ<sub>C</sub>) 182.0, 164.64 (d, *J* = 8.5 Hz), 161.52 (d, *J* = 134.4 Hz), 158.5, 143.9, 139.20 (dd, *J* = 131.4, 14.2 Hz), 137.26 (d, *J* = 15.6 Hz), 128.3, 120.5, 118.3, 113.45 (d, *J* = 5.0 Hz), 106.51 (dd, *J* = 19.5, 1.5 Hz), 99.7, 99.6, 98.2, 79.0, 78.6, 76.8, 73.4, 72.7, 71.8, 71.7, 71.4, 71.1, 70.4, 61.4, 60.5, 60.2, 60.0, 18.0; <sup>19</sup>F NMR (377 MHz, D<sub>2</sub>O, δ<sub>F</sub>) –131.6 (d, *J* = 5.0 Hz), –147.8 (d, *J* = 5.0 Hz); HRMS–ESI–TOF calcd for [M+Na]<sup>+</sup> C<sub>30</sub>H<sub>38</sub>O<sub>17</sub>F<sub>2</sub>Na: 708.2077. Found 708.2073.

# <sup>1</sup>H NMR Spectrum of Compound 5:

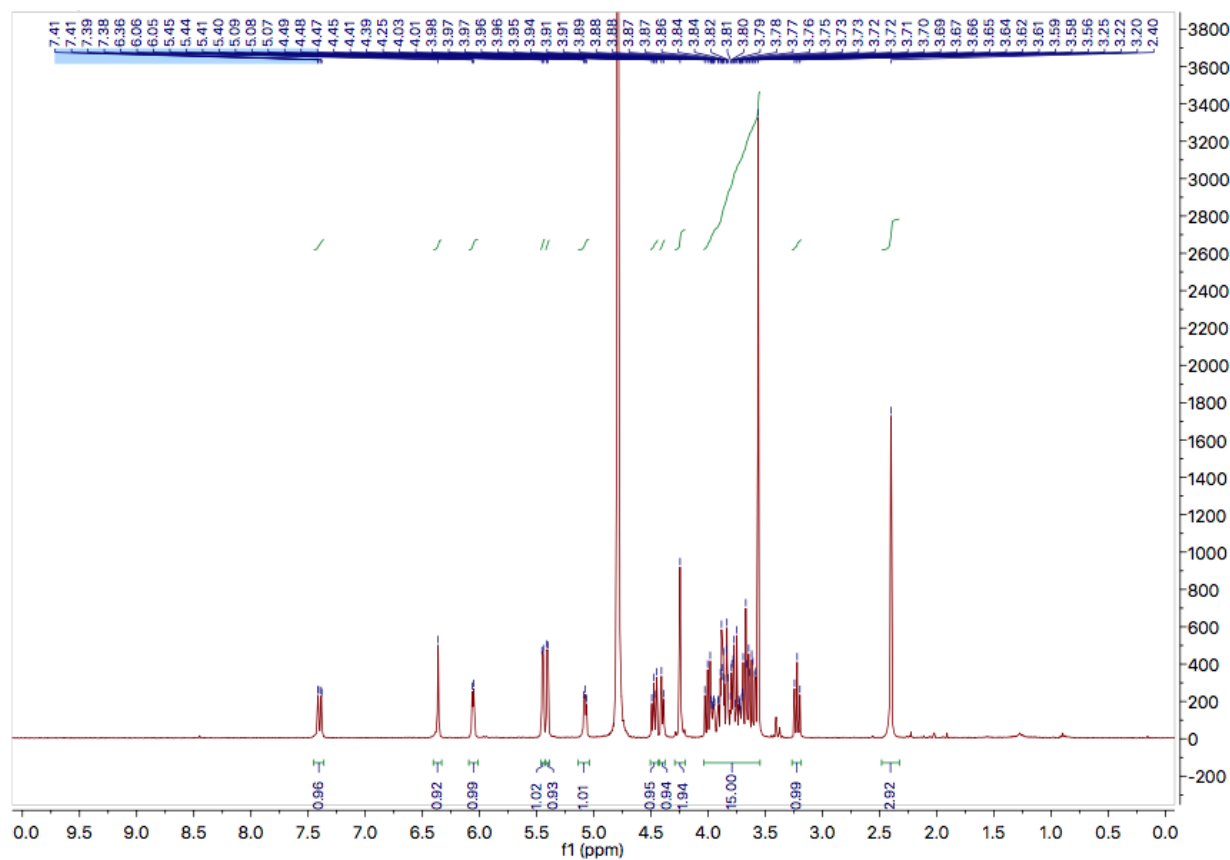

# <sup>13</sup>C NMR Spectrum of Compound 5:

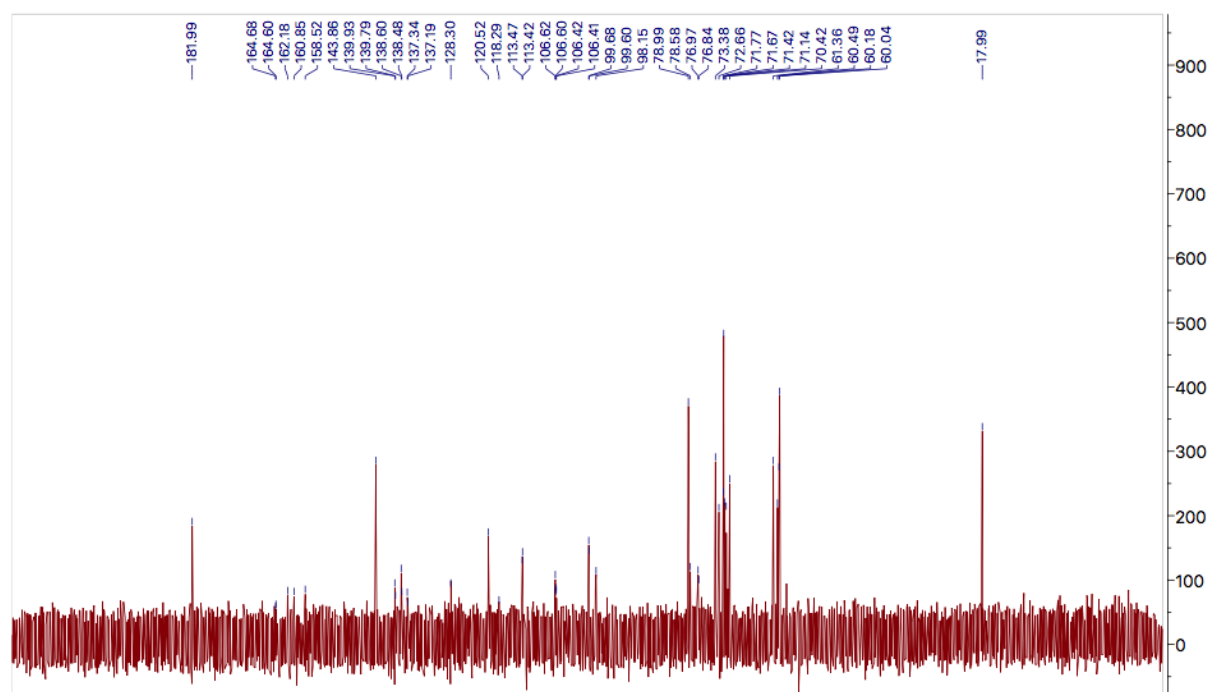

## 2. Intact-MS Experiments.

Each amylase was diluted to 100 nM in its respective buffer (Table S1) containing either 0  $\mu$ M **5** (wild-type amylase control) or 500  $\mu$ M **5**. Samples were then incubated for 30 min after which the reaction mixtures were placed in a centrifugal filter device (10,000 MWCO, NanoSep) and spun down to concentrate protein away from excess reagent. Each protein was immediately dissolved in 500  $\mu$ L of a 30% acetonitrile, 0.1% formic acid solution, and this sample (5  $\mu$ L) was injected onto a liquid chromatography system (Agilent 1200 HPLC equipped with an Agilent Zorbax 300SB-C8 column) and eluted using a gradient of 5%→95% acetonitrile (with 0.1% formic acid) for analysis by coupled ESI-MS (Agilent 6550 qTOF mass spectrometer). The protein elution peak was integrated, and UniDec 3.1.0<sup>6</sup> was used to deconvolve from the multiple charged species, followed by plotting with mMass 5.5.0.<sup>7</sup> The spectra are shown below.

A. Intact-MS spectra for *A. oryzae* amylase (AOA) with 0  $\mu\text{M}$  **5** (blue) and with 500  $\mu\text{M}$  **5** (green).

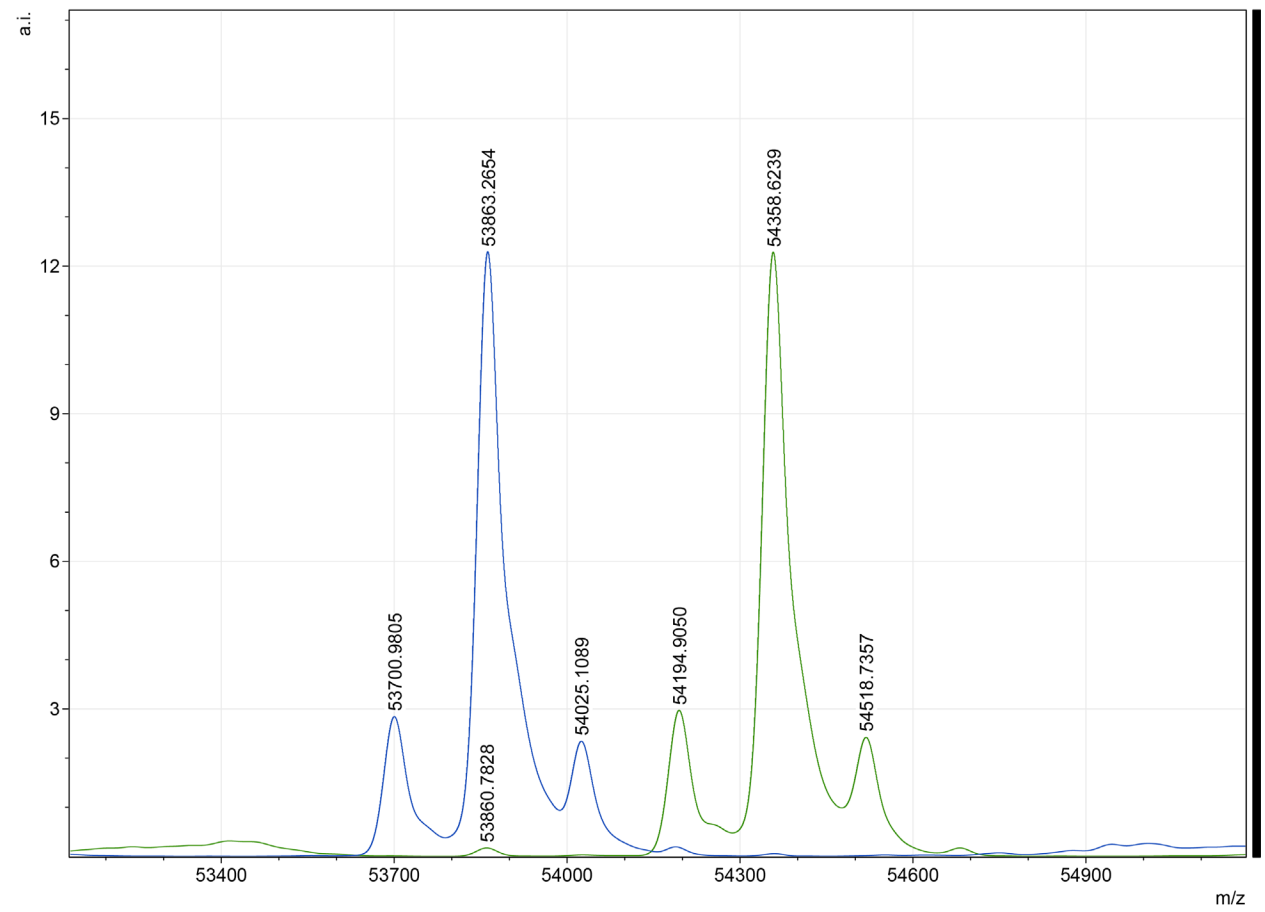



B. Intact-MS spectra for *E. pohliae* amylase (EPA) with 0  $\mu\text{M}$  **5** (green) and with 500  $\mu\text{M}$  **5** (blue).

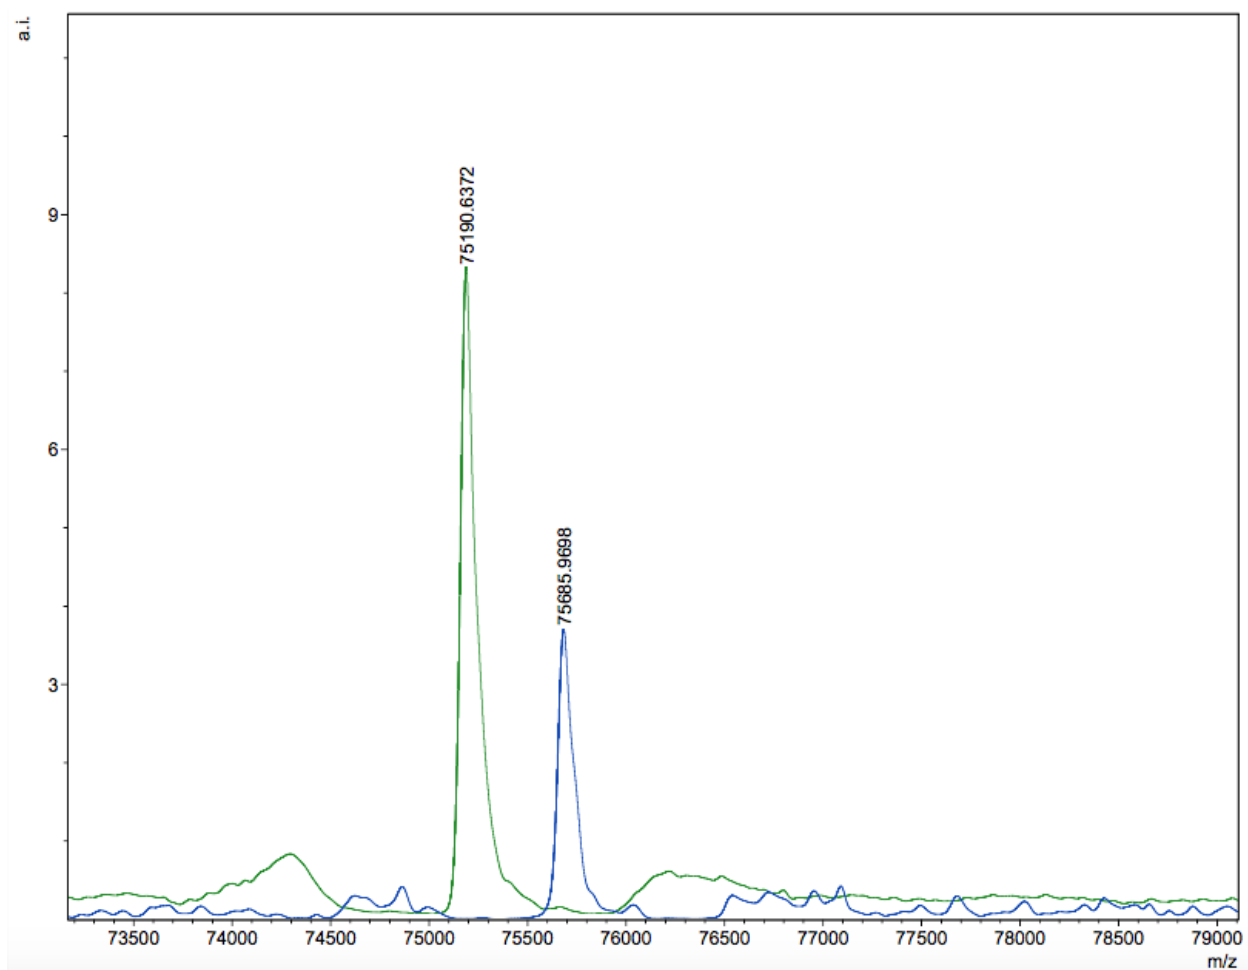

C. Intact-MS spectra for human pancreatic amylase (HPA) with 0  $\mu\text{M}$  **5** (blue) and with 500  $\mu\text{M}$  **5** (orange)

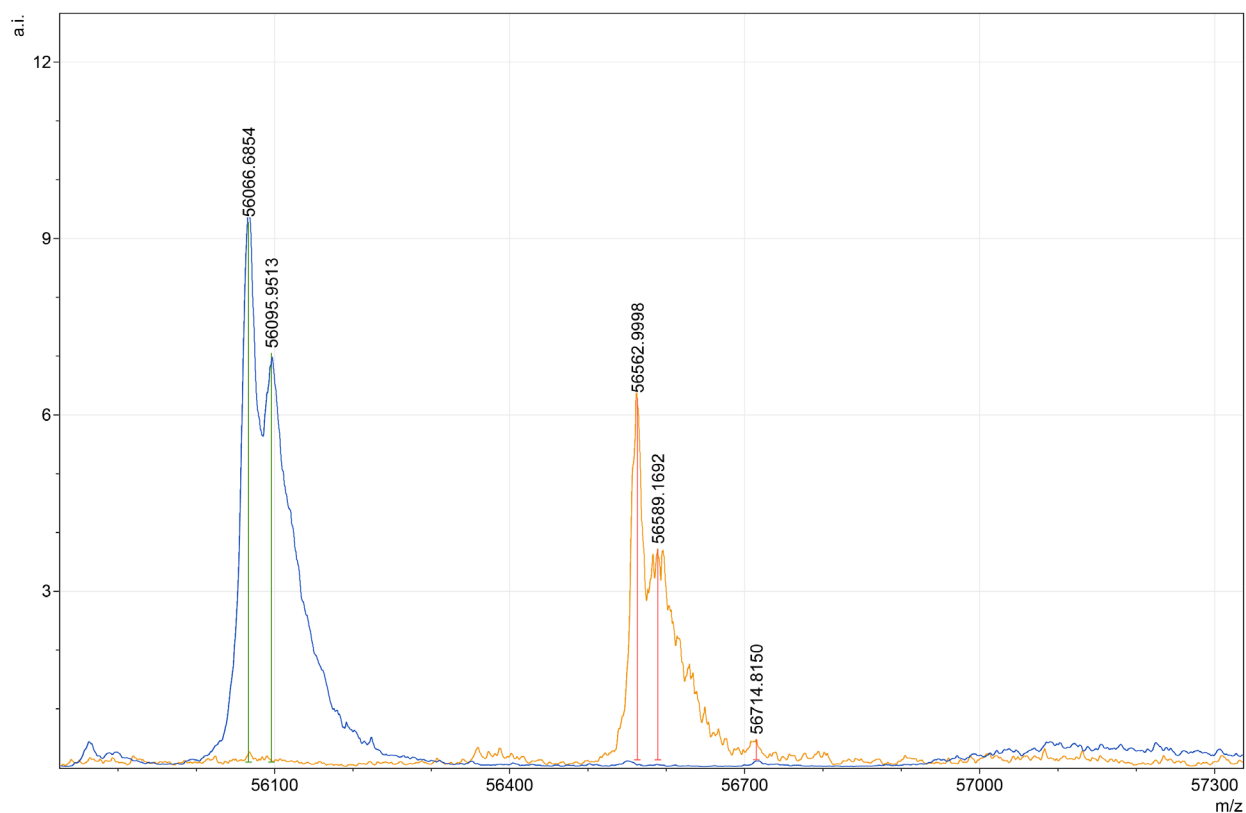

Figure S1. Intact protein mass spectra for A.) AOE, B) EPA, and C) HPA.

### 3. Enzyme Kinetics.

Enzyme kinetic experiments were performed as described below using the conditions outlined in Table S1. All experiments were performed in buffer with DMSO content (v/v) <5%.

| Enzyme                           | Buffer                               | pH  | T (°C) |
|----------------------------------|--------------------------------------|-----|--------|
| <i>E. pohliae</i> amylase (EPA)  | 50 mM NaOAc, 1 mM CaCl <sub>2</sub>  | 6.0 | 25     |
| <i>A. oryzae</i> amylase (AOA)   | 50 mM NaOAc, 1 mM CaCl <sub>2</sub>  | 6.0 | 25     |
| <i>R. pusillus</i> amylase (RPA) | 50 mM NaOAc, 1 mM CaCl <sub>2</sub>  | 6.0 | 25     |
| Human Pancreatic Amylase (HPA)   | 50 mM NaP <sub>i</sub> , 100 mM NaCl | 7.0 | 30     |
| Porcine Pancreatic Amylase (PPA) | 50 mM NaP <sub>i</sub> , 100 mM NaCl | 7.0 | 30     |

### Time-based Inactivation of Amylases.

Inactivator **5** (1 mM) was incubated with each enzyme under conditions listed in Table S1. At appropriate time-points, aliquots of this enzyme-inactivator reaction mixture were removed and diluted into a cuvette containing CNP-G3 (20 mM;  $>5 \times K_m$ ) that had been preincubated in the same buffer and temperature conditions (Table S1), such that the final volume was 200  $\mu$ L. The initial rate of CNP-G3 hydrolysis for each time-point aliquot was determined by monitoring the change in absorbance of the sample at 355 nm with respect to time on a Cary 4000 UV/Visible spectrophotometer. At the same time points, aliquots of enzyme without **5** treated in the same conditions were also removed, diluted into a cuvette containing CNP-G3 (20 mM;  $>5 \times K_m$ ) to a final volume of 200  $\mu$ L, and the initial rate of CNP-G3 hydrolysis was also determined by monitoring the change in absorbance of the sample at 355 nm with respect to time. The rates of CNP-G3 hydrolysis for each enzyme (with and without 1 mM **5**) were then compared, giving the remaining % activity over the time course of the experiment (Figure S2).

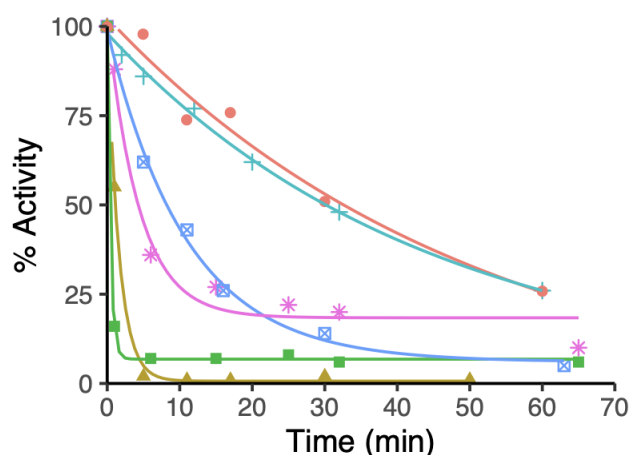

Figure S2. Percent activity remaining of various amylases with compound **5** (1 mM). Orange Circle: HPA. Blue Cross: AMG. Pink Star: RPA. Blue Box with X: PPA. Green Square: EPA. Yellow Triangle: AOA.

### Determination of $K_i$ , $k_{on}$ , and $k_{off}$ for the various amylases.

All experiments were carried out on a Cary UV/Visible spectrophotometer with each enzyme in the buffer and at the temperature listed in Table S1. The data were analyzed using the program GraFit 7.0 (Erithacus software). Varying concentrations of compound **5** were pre-incubated in buffer at 25 °C or 30 °C, based on the optimal conditions of the enzyme to be measured (Table S1), and the reaction then was initiated by the addition of enzyme. The release of F<sub>2</sub>Mu was monitored by absorbance at 370 nm (or at 380 nm for HPA and PPA). Re-plots of the observed initial rates for the formation of the cyclitol–enzyme intermediate vs [**5**] were fit to the Michaelis-Menten equation to provide  $k_{on}$  and  $K_i$  values. Rates of cyclitol release ( $k_{off}$ ) from the active site were determined at saturating concentrations of **5**, with the observed rate,  $V_{off}$ , divided by  $[E_0]$  to provide  $k_{off}$ .

*A. oryzae* amylase (AOA):

*Inhibition Constants*

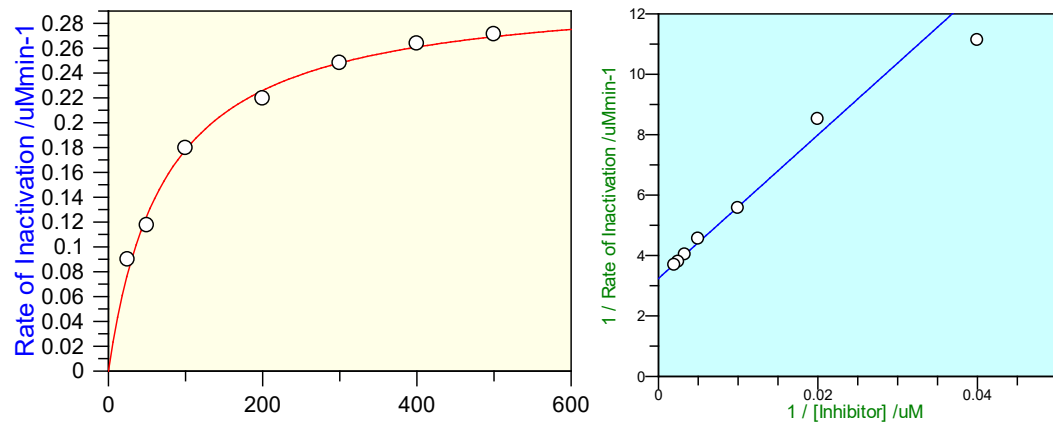

*R. pusillus* amylase (RPA):

*Inhibition Constants*

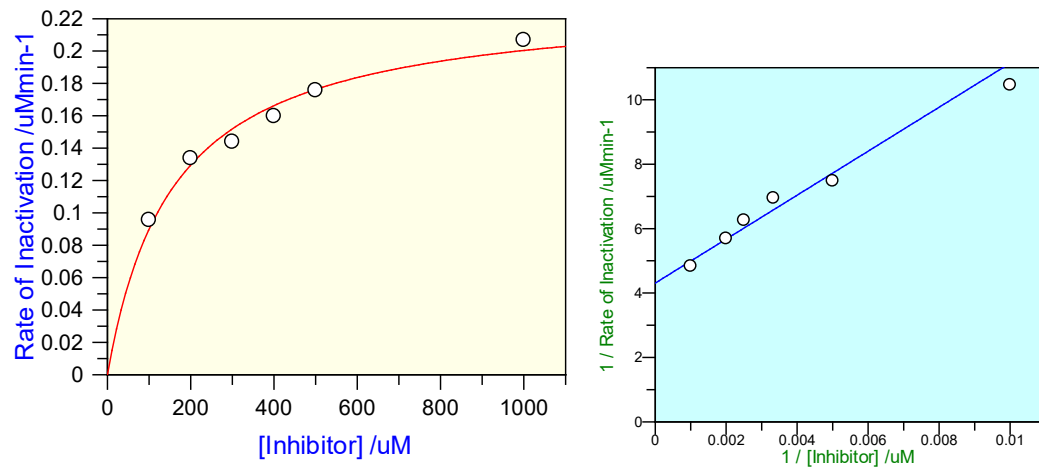

*E. pohliae* amylase (EPA):

### *Inhibition Constants*

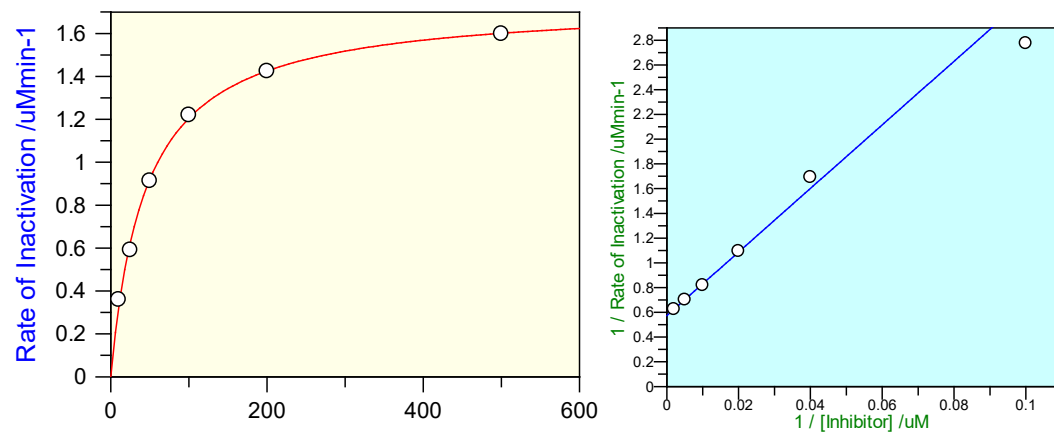

PPA:

### *Inhibition Constants*

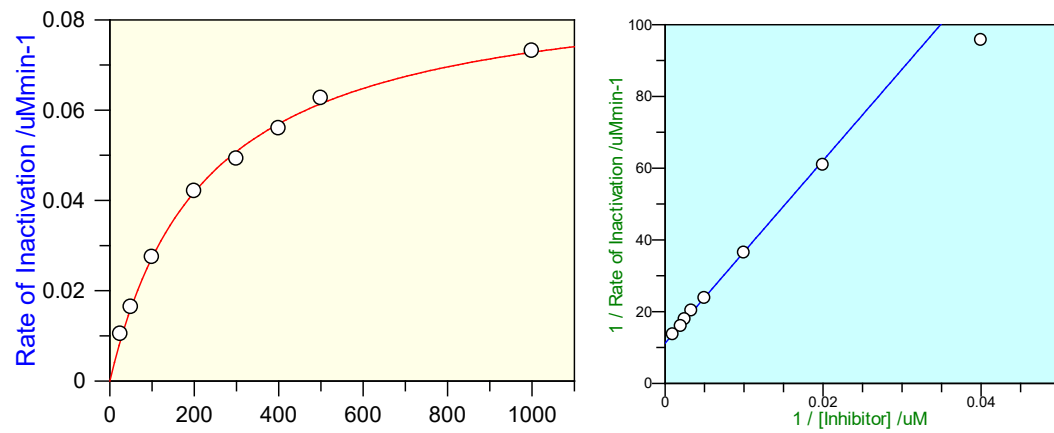

HPA:

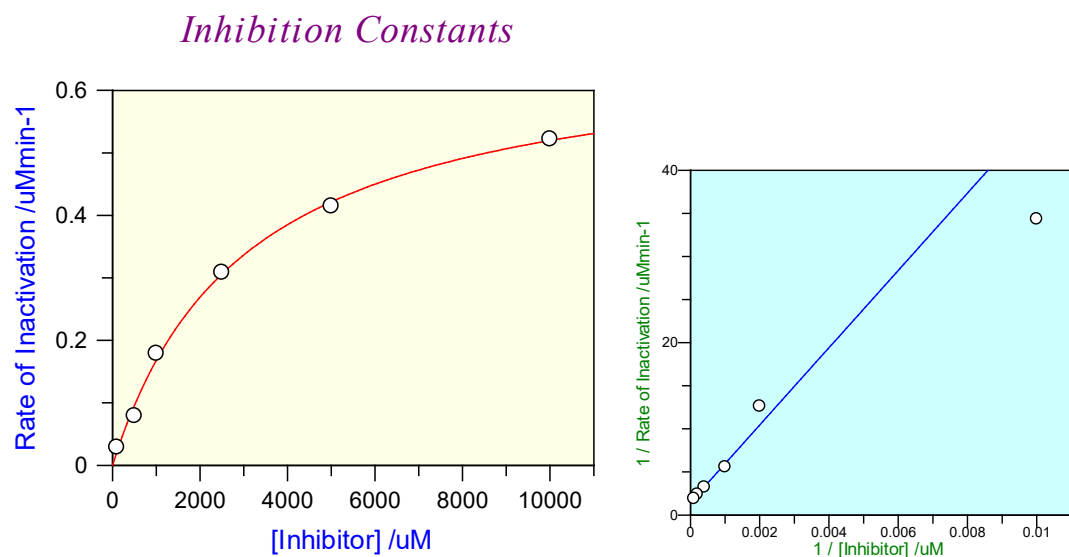

Figure S3. Michaelis-Menten plots to determine  $K_i$  and  $V_{\max}$  of several amylases via the plotting of initial rates with titration reagent **5**.

| Enzyme                           | $K_i$ ( $\mu\text{M}$ ) | $V_{\max}$ ( $\text{min}^{-1}$ ) |
|----------------------------------|-------------------------|----------------------------------|
| <i>A. oryzae</i> amylase (AOA)   | 73.39                   | 0.309                            |
| <i>R. pusillus</i> amylase (RPA) | 158.5                   | 0.232                            |
| <i>E. pohliae</i> amylase (EPA)  | 44.84                   | 1.745                            |
| PPA                              | 227.5                   | 0.089                            |
| HPA                              | 3038                    | 0.678                            |

Table S2. Michaelis-Menten parameters ( $K_i$  and  $V_{\max}$ ) of several amylases determined via plotting of initial rates with titration reagent **5**.

#### 4. Fluorescence Calibration Curve of [F<sub>2</sub>Mu].

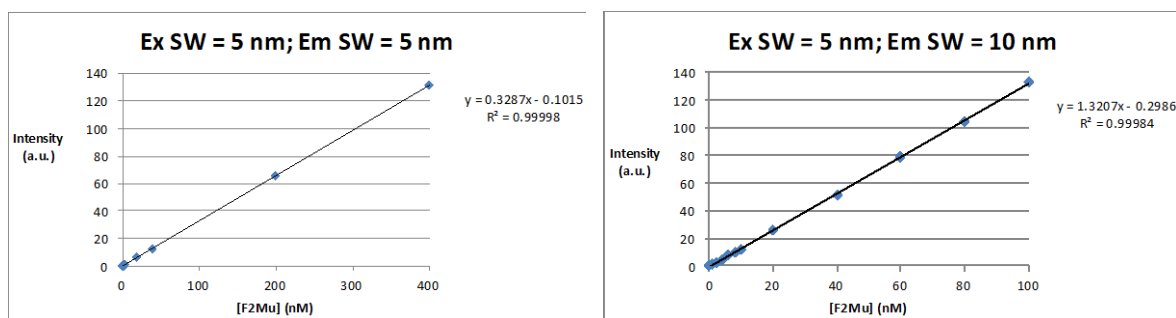

Figure S4. Calibration Curves for F<sub>2</sub>Mu: Excitation Slit Width = 5 nm, Emission Slit Width = 5 nm (left); Excitation Slit Width = 5 nm, Emission Slit Width = 10 nm (right).

The calibration curves were prepared by a 1000x dilution of a standard of F<sub>2</sub>MU of known concentration (1 mM in DMSO) to a concentration of 1  $\mu$ M in 50 mM NaOAc, 1 mM CaCl<sub>2</sub>, pH 6.0 buffer. This 1  $\mu$ M sample was then diluted in series down to 10 nM. This series of dilutions, and a blank sample containing 0 nM F<sub>2</sub>MU, were then scanned ( $\lambda_{\text{ex}} = 343$  nm,  $\lambda_{\text{em}} = 451$  nm) at 25 °C in sets of triplicates. The max intensity was then recorded and plotted vs. the known concentration of F<sub>2</sub>MU to give the corresponding plots at each set of slit widths described above.



## 5. Titrations of $\alpha$ -Glucosidases.

Compound **3** was dissolved in DMSO to provide a 50 mM stock, and diluted in distilled H<sub>2</sub>O to a working concentration of 1 mM. A model enzyme, Brewer's yeast glucosidase (Type VI, Cat. No. G6136, Millipore-Sigma), was used directly from lyophilized powder diluted in water (~1 mg/100  $\mu$ L) and used immediately or stored on ice. Cuvettes were primed with 350  $\mu$ L of buffer (50 mM NaPi, 100 mM NaCl, pH = 7.0) and 30  $\mu$ L of compound **3** (final concentration of 75  $\mu$ M). Fluorescence intensity was monitored ( $\lambda_{\text{ex}}$  = 343 nm,  $\lambda_{\text{em}}$  = 451 nm) for approximately 8 minutes at 25 °C. Readings were then briefly paused and the reaction was initiated by addition of  $\alpha$ -glucosidase (20  $\mu$ L) to each cuvette with mixing. Fluorescence intensity monitoring continued for an additional 50 min. This was repeated with 2 further dilutions of  $\alpha$ -glucosidase to ensure response indeed scaled with amount of glucosidase. Final volume of 400  $\mu$ L in each cuvette was maintained by increasing the volume of buffer.

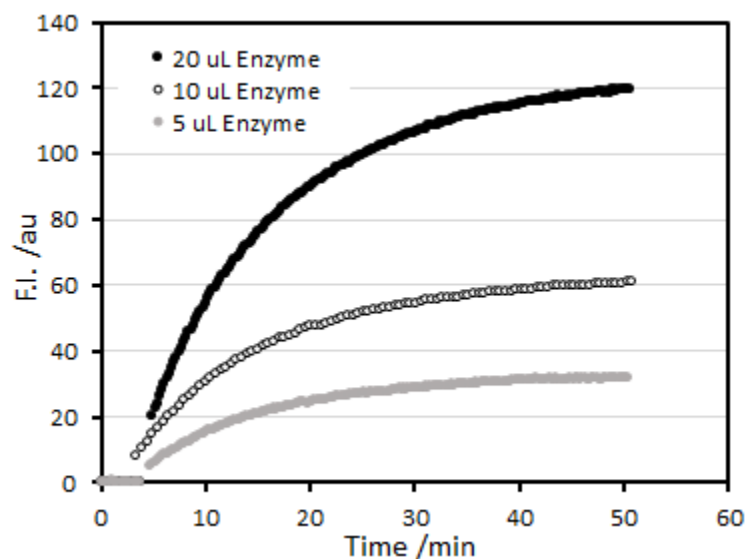

Figure S5. Titration of an  $\alpha$ -glucosidase from Brewer's Yeast with compound **3** (75  $\mu$ M).

## Titration of Amylases.

All experiments were carried out in buffer (depending on the enzyme measured; Table S1) with a Cary Eclipse fluorescence spectrophotometer at 20 °C. In a cuvette, the enzyme was pre-incubated in buffer (360  $\mu$ L total) for 2 min, and the reaction was initiated by the addition of 1 mM titration reagent **5** (40  $\mu$ L). At the same time, two more cuvettes were prepared in this manner to get triplicate measurements. Also at the same time, 1 mM titration reagent **5** (40  $\mu$ L) was added to buffer (360  $\mu$ L) in a separate cuvette to give  $F_{\text{background}}$  (the background fluorescent signal of  $F_2\text{Mu}$  present in solution). Fluorescence was then monitored over time for all four prepared cuvettes. These measurements gave initial burst phases ( $F_{\text{final}}$ ), as well as a linear steady-state line that corresponds to the slow turnover phases ( $k_{\text{off}}$ ). After subtraction of  $F_{\text{background}}$  from  $F_{\text{final}}$  (Equation S1), this steady-state line was extrapolated back to the y-intercept ( $t=0$ ) to determine the burst ( $F_{\text{response}}$ ) for each titration.  $F_2\text{Mu}$  release was calculated based on the calibration curve of  $F_2\text{Mu}$  (Figure S3). The concentration of the enzyme was then calculated according to Equation 1 in the main text, and the enzymes' corresponding rate constants (Table 2).

$$\text{Equation S1: } F_{\text{response}} = F_{\text{final}} - F_{\text{background}}$$

$$\text{Equation S2: } F_{\text{background}} = 0.903(\text{Intensity/min}) \cdot t + F_{\text{initial}(t=0)}$$

## Burst Plots of Amylase Titrations.

A. *E. pohliae* amylase (EPA):

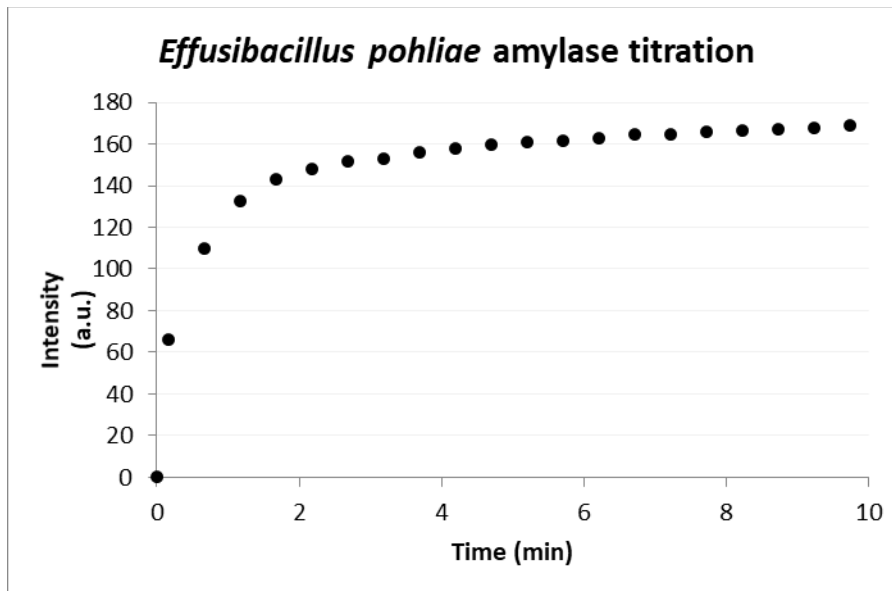

B. *A. oryzae* amylase (AOA):

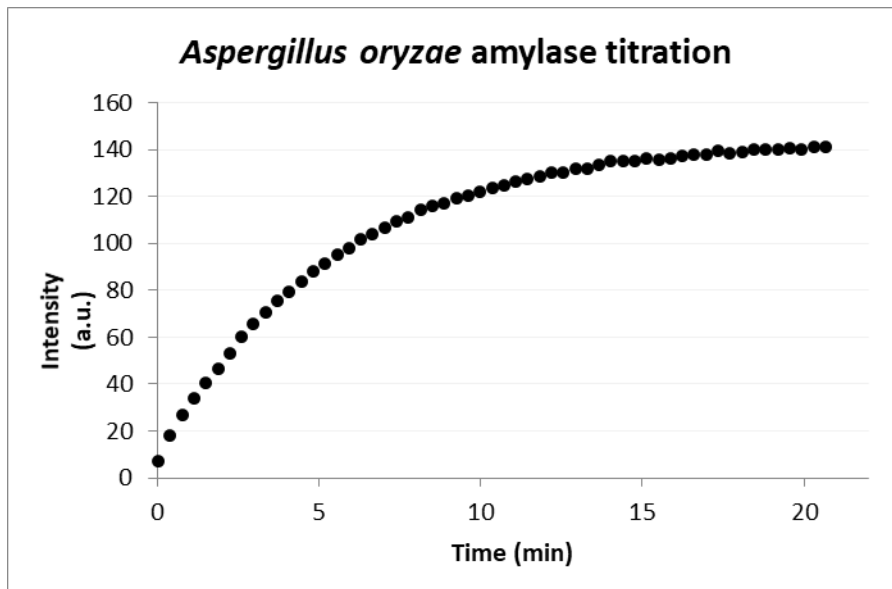

C. Porcine pancreatic amylase (PPA):

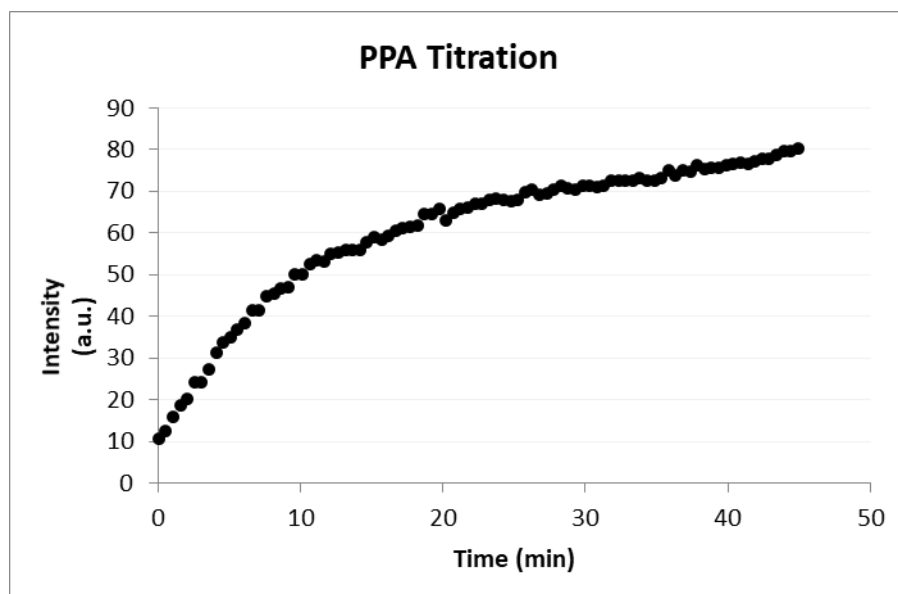

D. *R. pusillus* amylase (RPA):

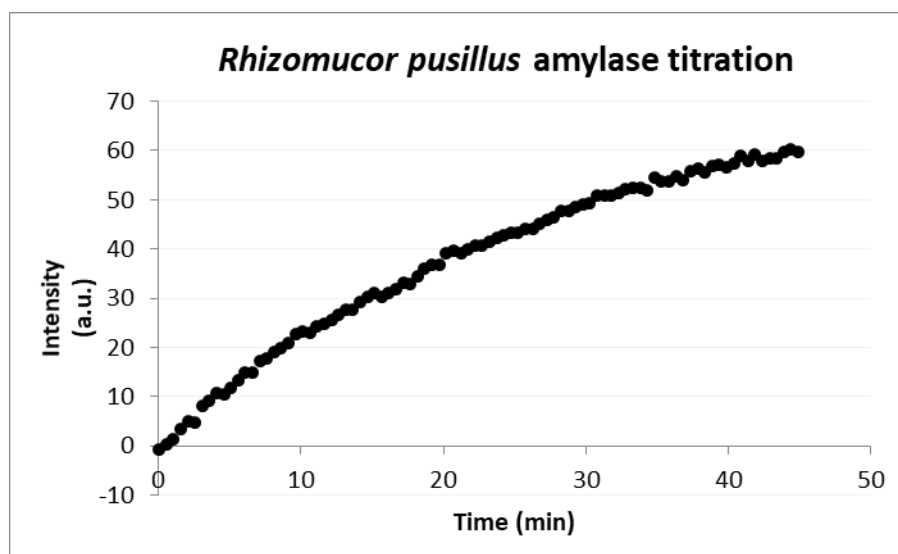

Fig S6: Plots of amylase titrations.

## Raw Bursts of Titrations (serial 2x dilutions of *E. pohliae* amylase (EPA).

100 nM EPA:

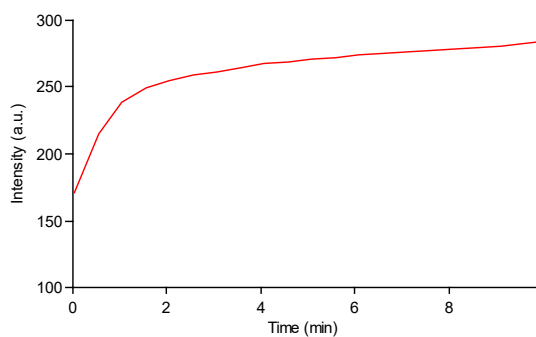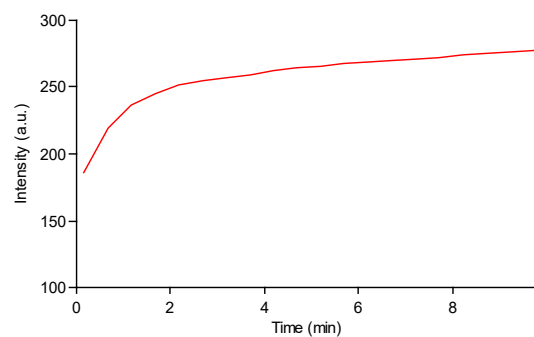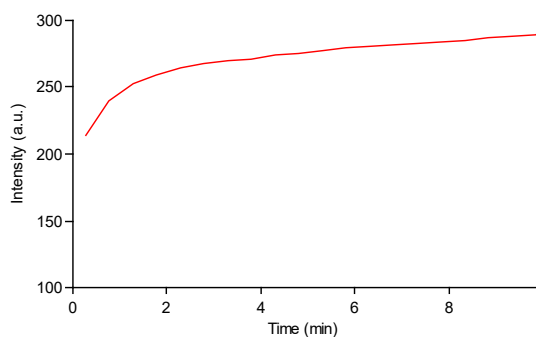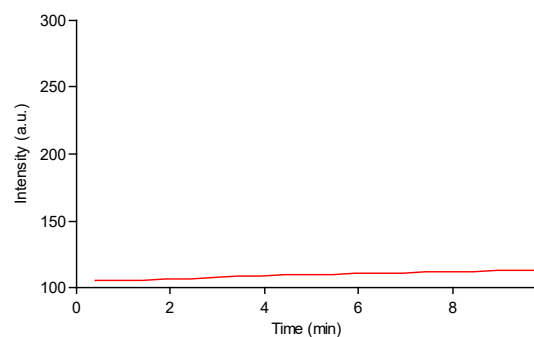

50 nM EPA:

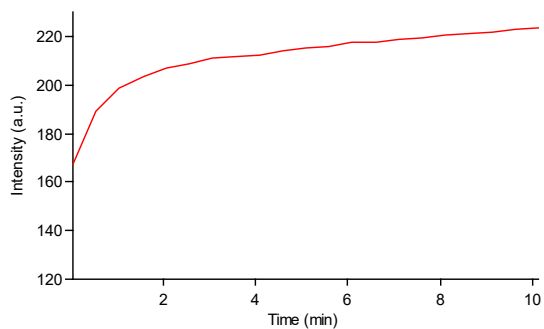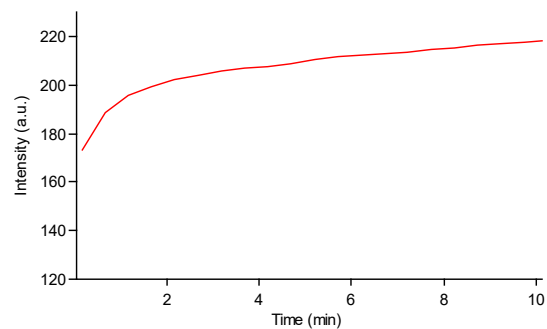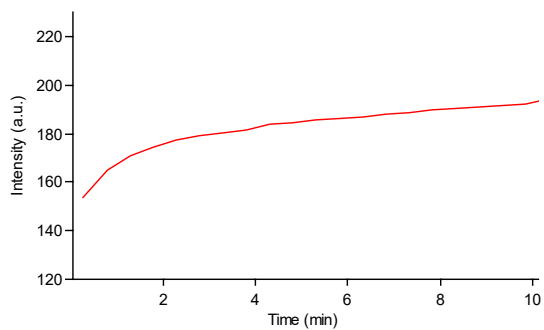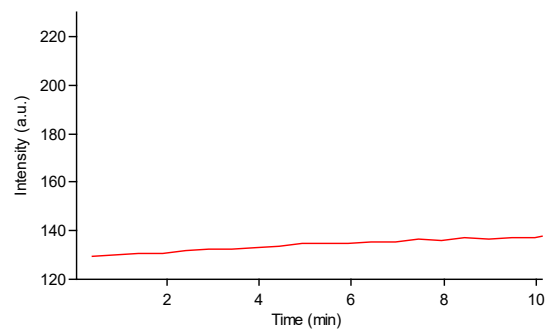

25 nM EPA:

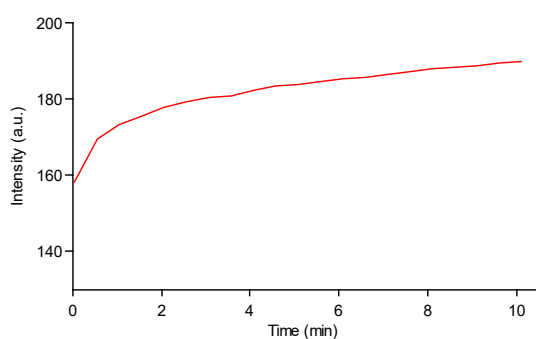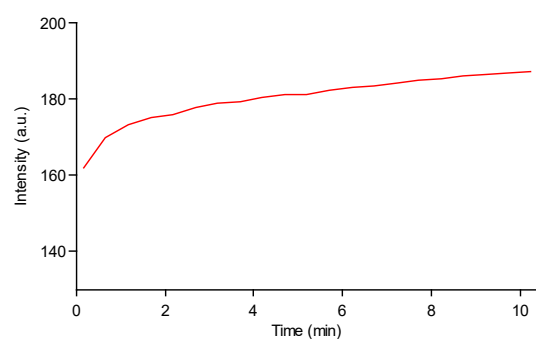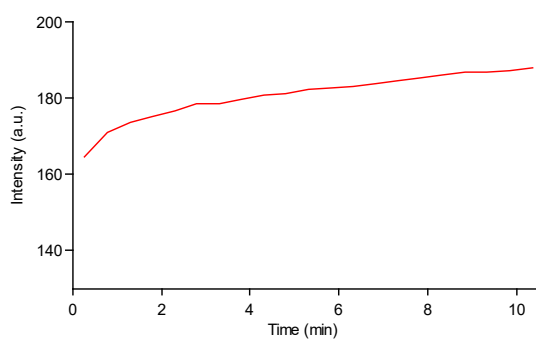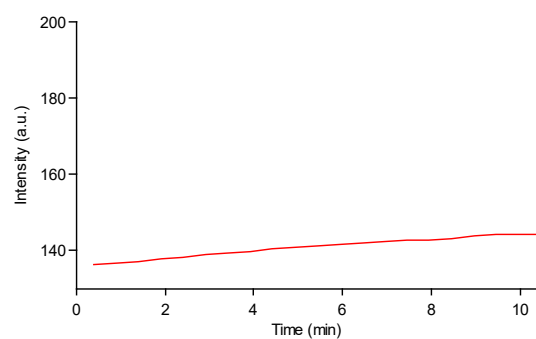

12.5 nM EPA:

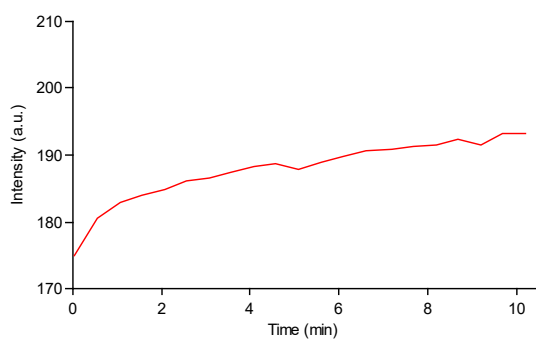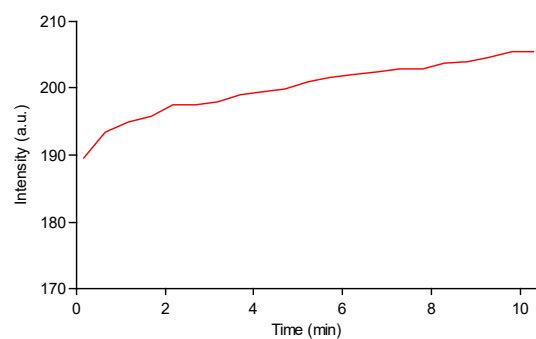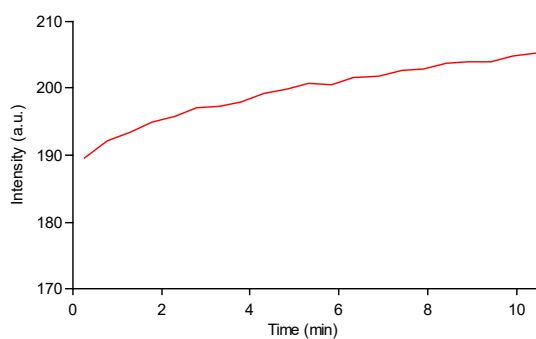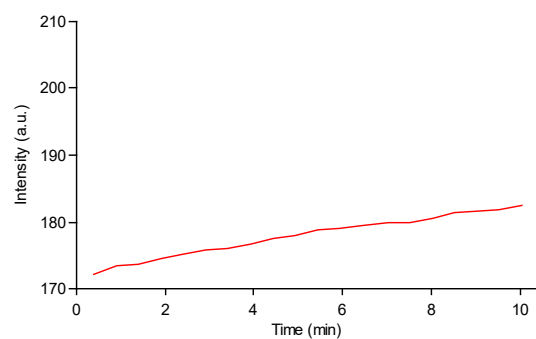

6.25 nM EPA:

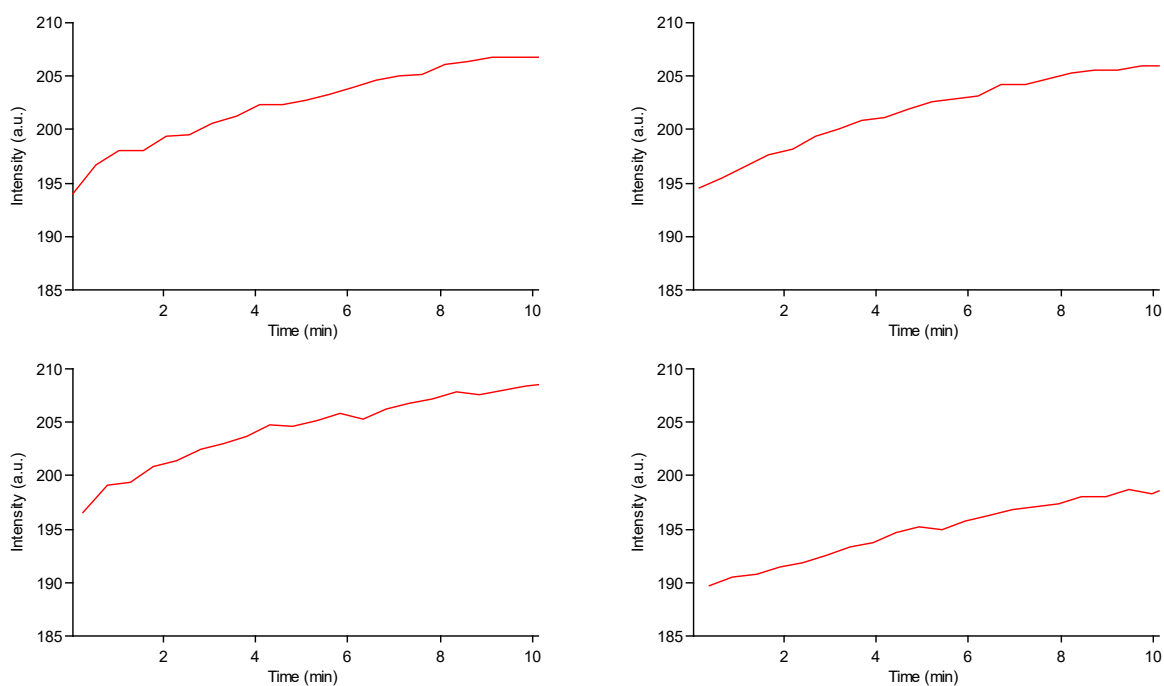

3.1 nM EPA:

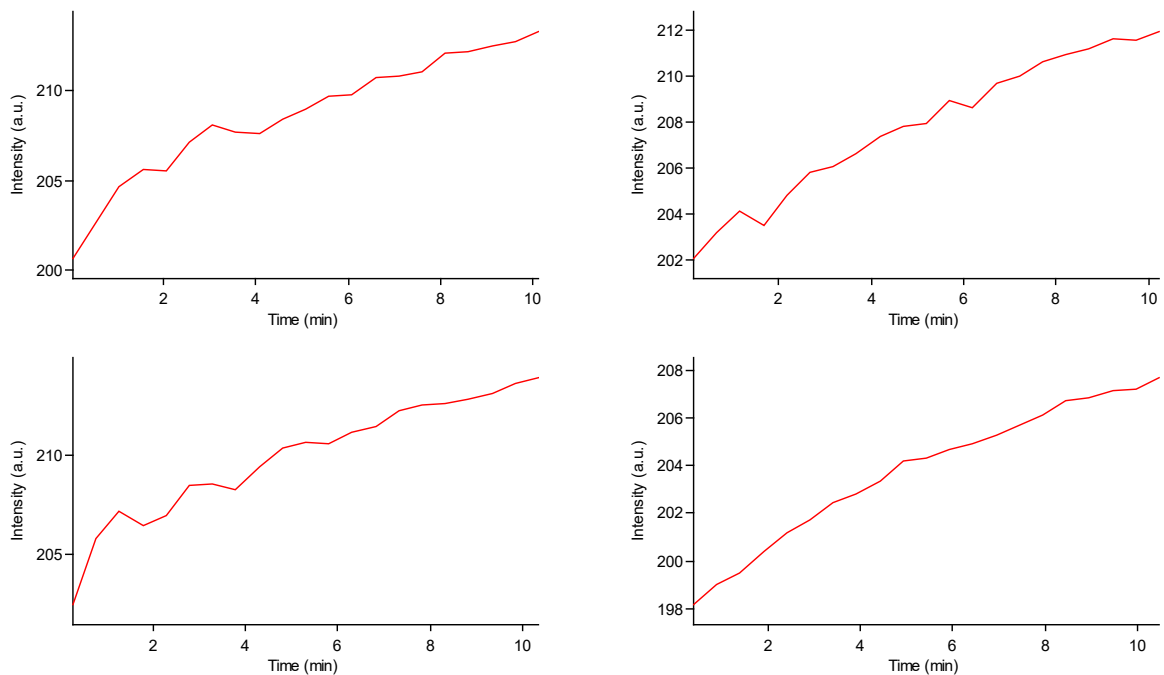

Figure S6. Raw fluorescence bursts for a series of 2 x dilutions of EPA (100 nM – 3.1 nM). Top left, top right, and bottom left plots are triplicates, and bottom right plot is hydrolysis of **5**.

## References:

- 1 C. Roth, O. V. Moroz, J. P. Turkenburg, E. Blagova, J. Waterman, A. Ariza, L. Ming, S. Tianqi, C. Andersen, G. J. Davies and K. S. Wilson, *IJMS*, 2019, **20**, 4902–4915.
- 2 E. H. Rydberg, G. Sidhu, H. C. Vo, J. Hewitt, H. C. F. Cote, Y. Wang, S. Numao, R. T. A. MacGillivray, C. M. Overall, G. D. Brayer and S. G. Withers, *Protein Sci.*, 1999, **8**, 635–643.
- 3 T. Shing, Y. Chen and W. Ng, *Synlett*, 2011, **9**, 1318–1320.
- 4 I. Damager, S. Numao, H. Chen, G. D. Brayer and S. G. Withers, *Carbohydr. Res.*, 2004, **339**, 1727–1737.
- 5 P. J. P. Adabala, S. S. K. Abadi, O. Akintola, S. Bhosale and A. J. Bennet, *J. Org. Chem.*, 2020, **85**, 3336–3348.
- 6 M. T. Marty, A. J. Baldwin, E. G. Marklund, G. K. A. Hochberg, Justin L. P. Benesch and C. V. Robinson, *Anal. Chem.*, 2015, 4370–4376.
- 7 T. H. J. Niedermeyer and M. Strohm, *PLOS One*, 2012, **7**, e44913.
